# Supplementary material for: Genome-wide analysis of the spatiotemporal regulation of firing and dormant replication origins in human cells
Source: PubMed Central journal article supplement — Nucleic Acids Res. 2018 Jun 9;46(13):6683–96. doi: 10.1093/nar/gky476 (PMC6061783; doi:10.1093/nar/gky476), 2018-06-09
Supplement: gky476_supplemental_files.pdf [file gky476_supplemental_files.pdf]

## Supplemental data

### Genome-wide analysis of the spatiotemporal regulation of firing and dormant replication origins in human cells

Nozomi Sugimoto<sup>1,\*</sup>, Kazumitsu Maehara<sup>2</sup>, Kazumasa Yoshida<sup>1</sup>, Yasuyuki Ohkawa<sup>2</sup> and Masatoshi Fujita<sup>1,\*</sup>

<sup>1</sup> Department of Cellular Biochemistry, Graduate School of Pharmaceutical Sciences, Kyushu University, 3-1-1 Maidashi, Higashiku, Fukuoka 812-8582, Japan

<sup>2</sup> Division of Transcriptomics, Medical Institute of Bioregulation, Kyushu University, 3-1-1 Maidashi, Higashiku, Fukuoka 812-8582, Japan

\* To whom correspondence should be addressed. Tel: +81-92-642-6637; Fax: +81-92-642-6635; Email: sugimoto@phar.kyushu-u.ac.jp and mfujita@phar.kyushu-u.ac.jp

#### SUPPLEMENTAL FIGURE LEGENDS

##### Supplemental Figure S1. Quality control of MCM7 ChIP-Seq analysis.

(A) HeLa cells were transfected with control (mixture of siLuci and siGFP) or MCM7 (mixture of MCM7-2 and -3) siRNAs for 48 h using Lipofectamine RNAiMAX (Invitrogen) according to the manufacturer's instructions, and subjected to immunoblotting using anti-MCM7 antibody (29). siRNA oligonucleotides were synthesised by IDT as follows (sense strand):

siMCM7-2 (5'-AGAUGCAAGAACAUGUGAUCAGdGdT-3'),

siMCM7-3 (5'-GGCGGCUCUGGAUGAAUAUGAGGdAdG-3').

Sequences of siLuci and siGFP controls were previously reported (28). Relative amounts of MCM7 are shown below. (B) ChIPed DNA analysis by SYBR Gold staining and UV imaging. 1–3, standard DNAs. 4–7, co-precipitated DNAs prepared from HeLa cells transfected with control (mixture of siLuci and siGFP) or MCM7 (mixture of siMCM7-2 and -3) siRNAs for 48 h with anti-MCM7 antibody or control rabbit IgG. (C) The amount of co-precipitated DNA was semi-quantified using standard DNA and input DNA using a UV spectrometer. (D) The number of MCM7\_1st\_wo0.5\_SNS peaks within 0.5 kb of MCM7\_2nd\_wo0.5\_SNS peaks is significantly higher than that obtained with shuffled MCM7\_1st\_wo0.5\_SNS peaks. \* indicates  $p < 0.0001$  by Chi-square test. (E) Aggregation plots showing the localisation of MCM7\_2nd\_wo0.5\_SNS peaks and shuffled peaks surrounding MCM7\_1st\_wo0.5\_SNS peaks.

##### Supplemental Figure S2. Analyses of firing and dormant origins classified with original SNS-Seq data.

(A) Selected snapshots of the genome browser view around the *LMNB2*, *MCM4*, and *MYC* loci. Visual representations of sMCM7, SNS-Seq (12, 13), and Ini-Seq (40) data are shown. Green lines indicate

known origin regions. (B) Venn diagram showing overlap (within 0.5 kb) of sMCM7 and original SNS-Seq peaks (12). (C) The number of sMCM7 peaks within 0.5 kb of the SNS peaks is significantly higher than that obtained with shuffled sMCM7 peaks. \* indicates  $p < 0.0001$  by Chi-square test. (D) Aggregation plots showing the localization of the SNS peaks and shuffled peaks surrounding sMCM7 peaks. (E) Aggregation plots showing FAIRE-Seq signals surrounding the indicated origin classes. (F) Aggregation plots showing the signals of MCM7\_1st ChIP-Seq surrounding the indicated origin classes. (G) Firing and dormant origin sites were aggregated together with TSS sites.

#### **Supplemental Figure S3. Analyses of firing and dormant origins classified with Ini-Seq data.**

(A) Venn diagram showing overlap (within 0.5 kb) of sMCM7 and Ini-Seq peaks (40). (B) The number of sMCM7 peaks within 0.5 kb of Ini-Seq peaks is significantly higher than that obtained with shuffled sMCM7 peaks. \* indicates  $p < 0.0001$  by Chi-square test. (C) Aggregation plot showing the localization of Ini-Seq peaks (40) and shuffled peaks surrounding sMCM7 peaks. (D) Aggregation plots showing FAIRE-Seq signals surrounding the indicated origin classes. (E) Aggregation plots showing the signals of MCM7\_1st ChIP-Seq surrounding the indicated origin classes. (F) Firing and dormant origin sites were aggregated together with TSS sites. (G) GC content of 10,000 randomly selected origins. Grey boxes represent results obtained using shuffled datasets. The Wilcoxon rank sum test was used to calculate  $p$ -values. (H) Aggregation plots of G4-Seq peaks surrounding firing and dormant origins.

#### **Supplemental Figure S4. Additional properties of firing and dormant origins.**

(A) Aggregation plots showing ChIP-Seq signals of MCM7\_2nd surrounding the indicated origin classes (left). Cumulative MCM7\_2nd ChIP-Seq signals surrounding firing or dormant origins ( $\pm 1$  kb from the centre of each peak) are also shown (right). (B) Aggregation plots showing FAIRE-Seq signals surrounding the indicated histone markers. (C) Averaged profiles of sMCM7 at all genes were calculated to assess the distribution of these sites on genes. Marks -5 kb and +5 kb indicate 5kb upstream of TSSs and 5 kb downstream of TES, respectively.

#### **Supplemental Figure S5. Comparison of correlation between various MCM ChIP-Seq data and SNS or Ini-Seq data.**

(A-E) Venn diagram showing the overlap (within 0.5 kb) of MCM peaks from different datasets and SNS (left) or Ini-Seq (right) peaks in HeLa cells. For data sources, see Supplemental Table S1. (A) These are same as Figure 1E and Supplemental Figure S3A. (B) Original MCM2 ChIP-Seq data were obtained from Cucco et al. (38). (C) Because the number of the original MCM2 ChIP-Seq peaks appears small compared with our MCM7 peaks, we also investigated the re-analysed MCM2 peaks obtained with peak detection and identification method we used for MCM7 (see Materials and Methods). (F-H) Venn diagram showing the overlap (within 0.5 kb) of MCM peaks and SNS peaks in K562 cells. For data sources, see Supplemental Table S1.

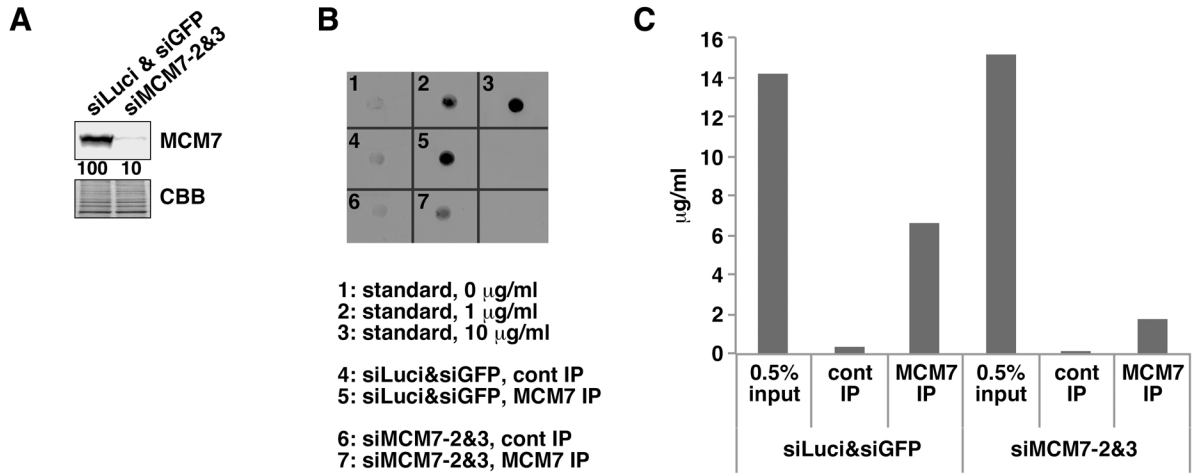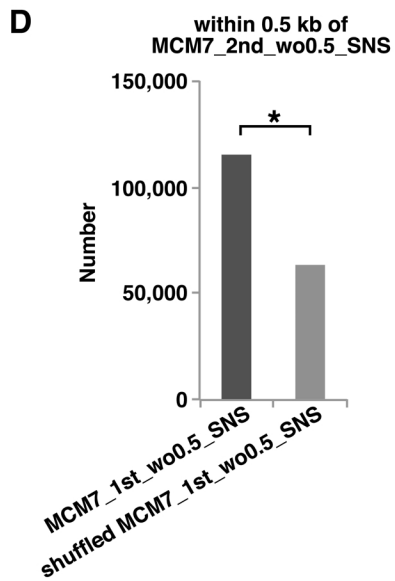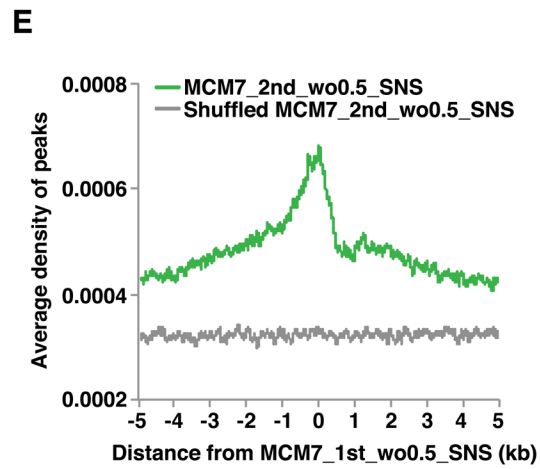

Supplemental Figure S1  
Sugimoto et al.

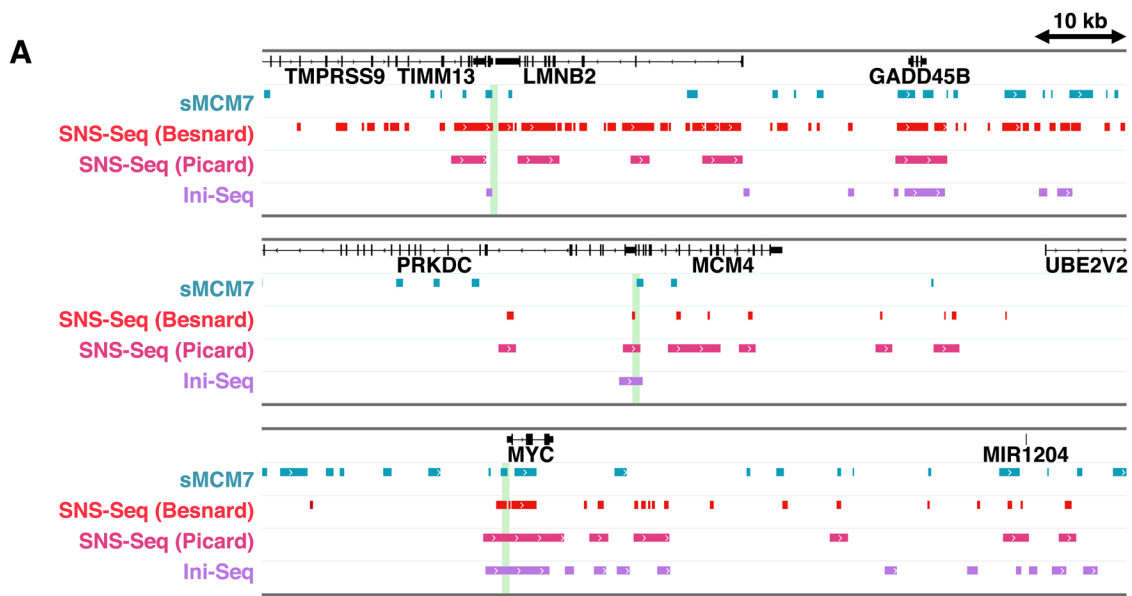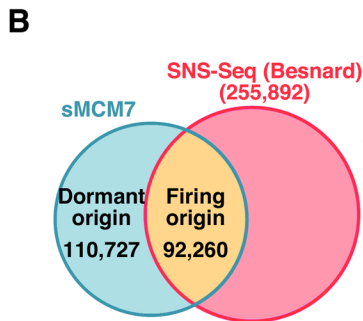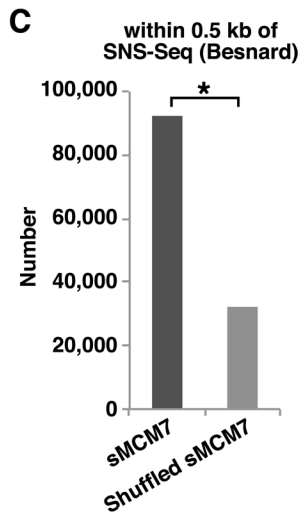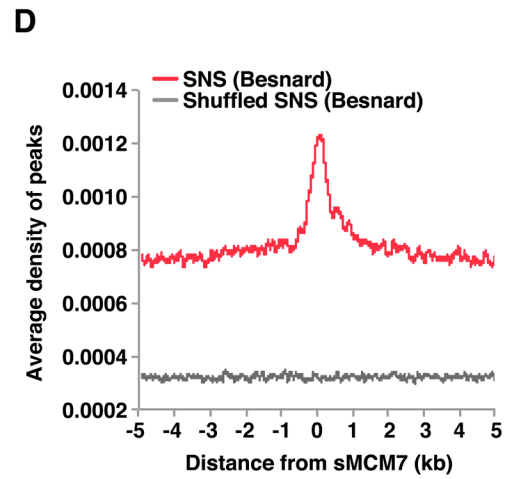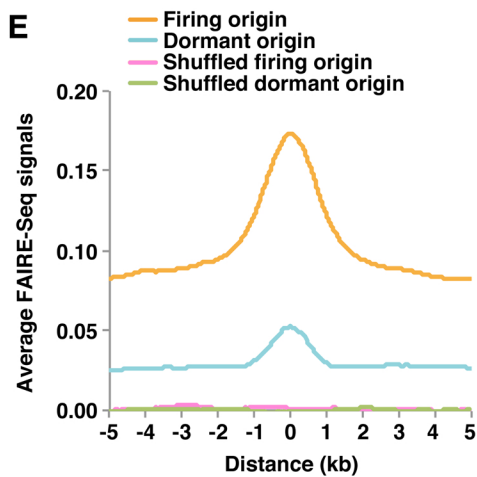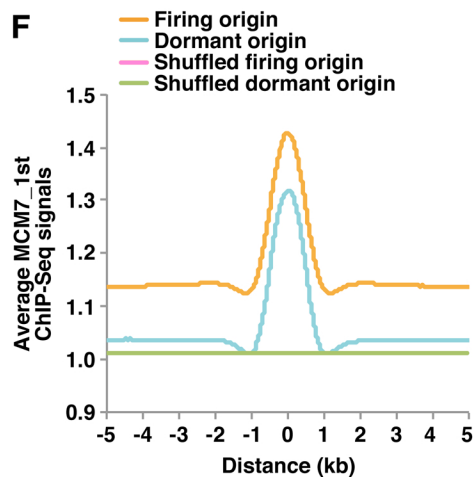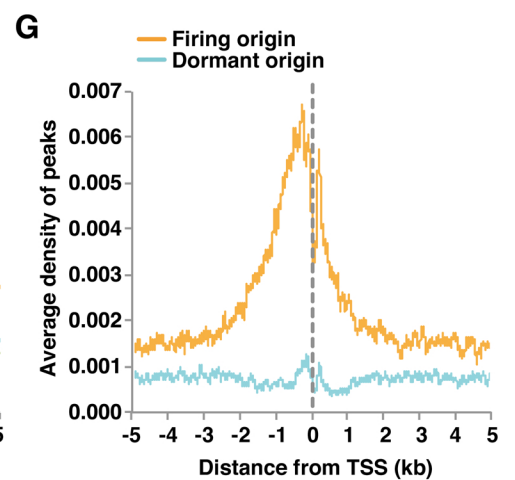

Supplemental Figure S2  
Sugimoto et al.



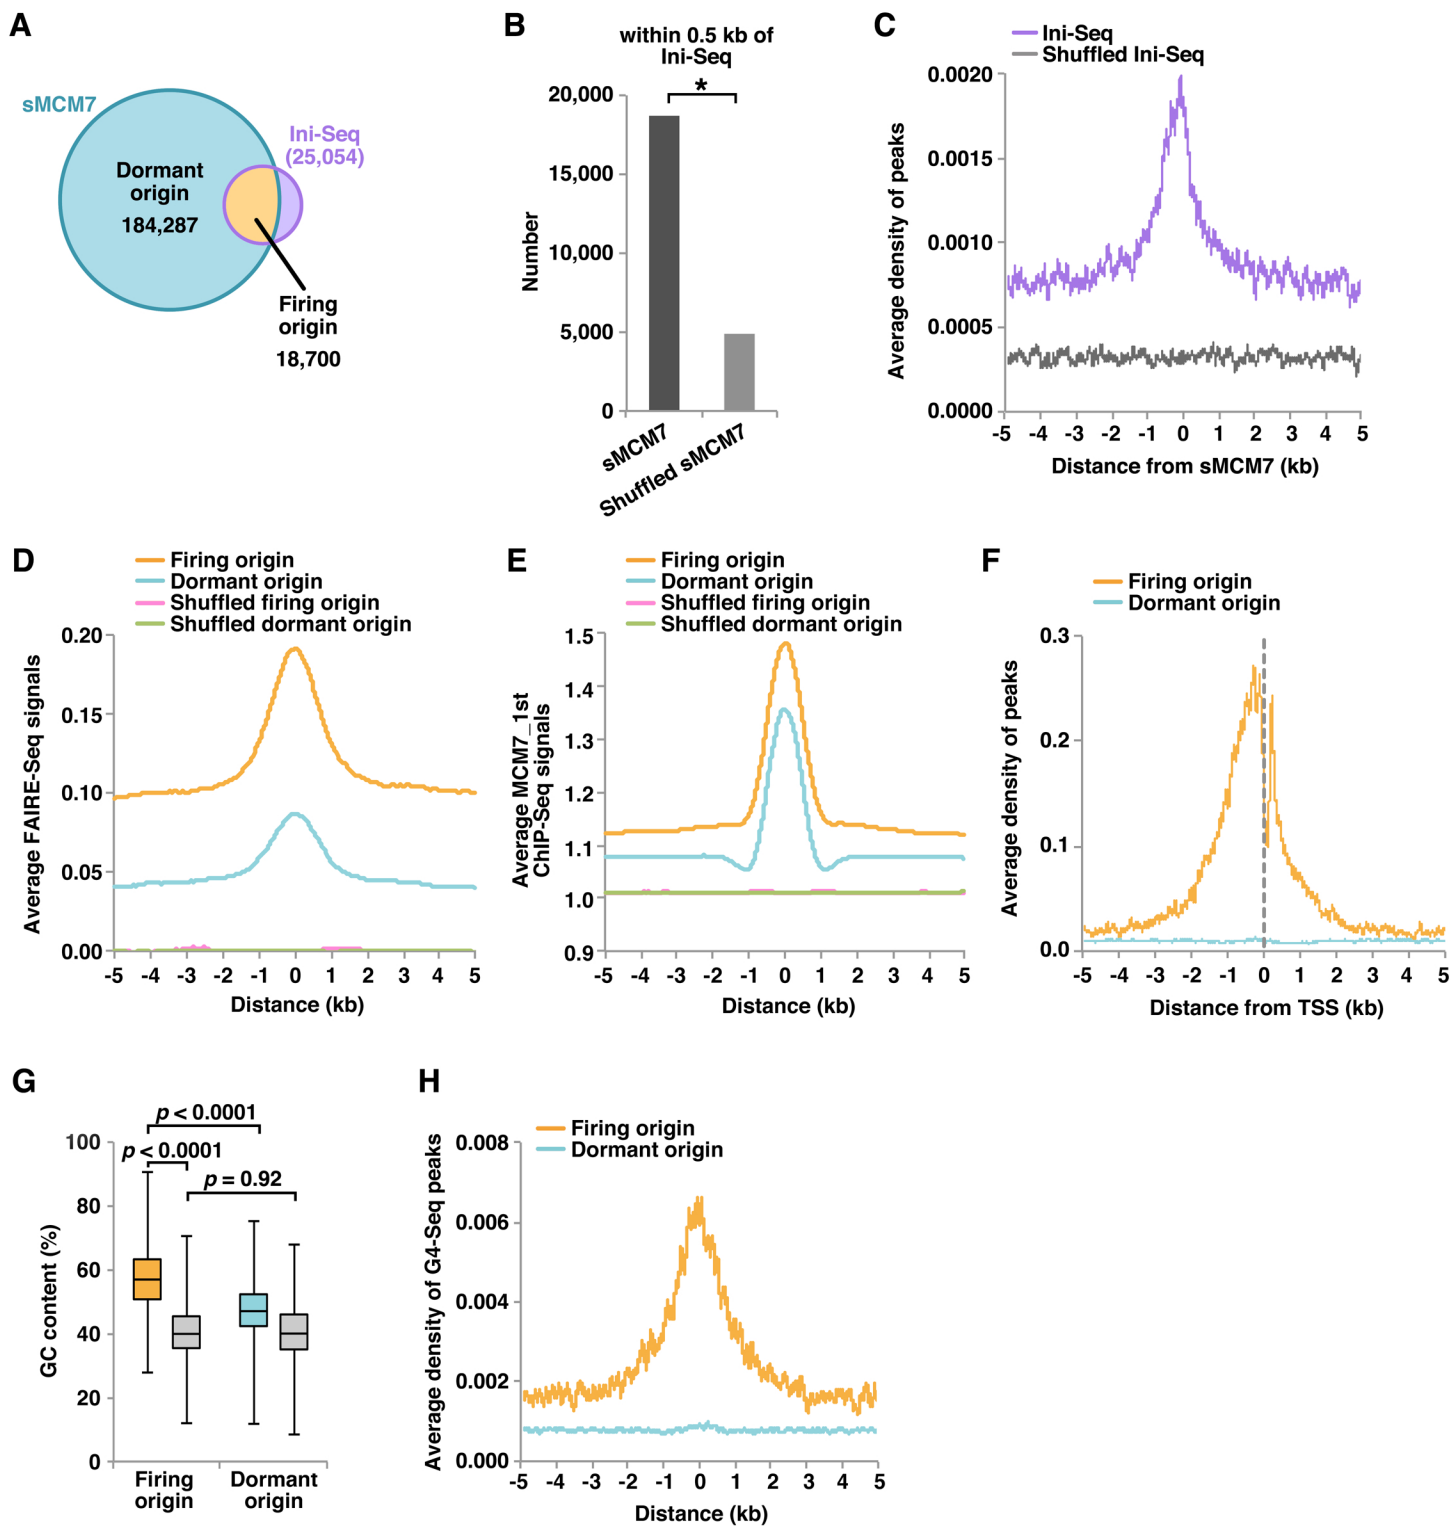

Supplemental Figure S3  
Sugimoto et al.

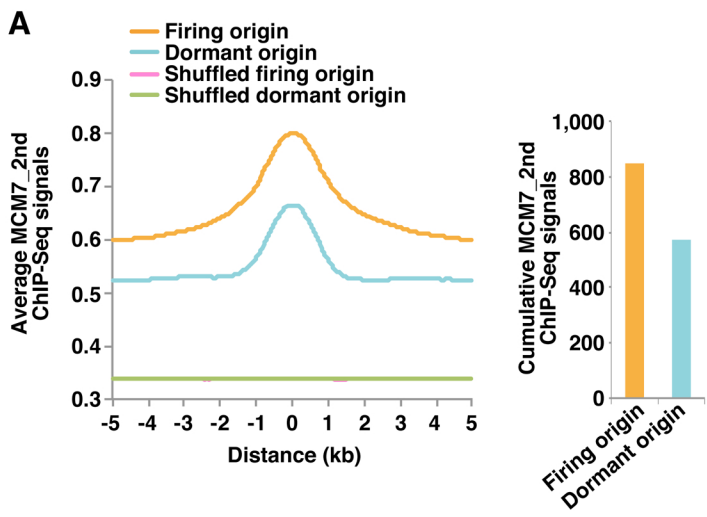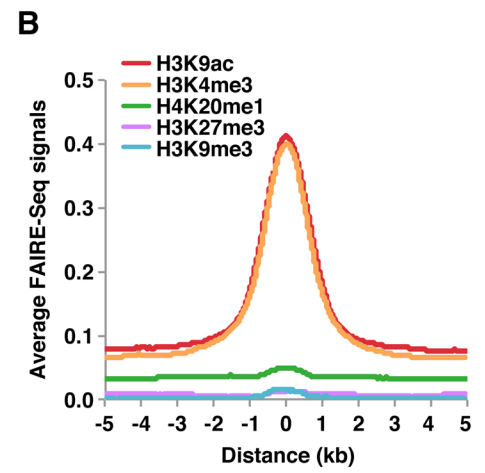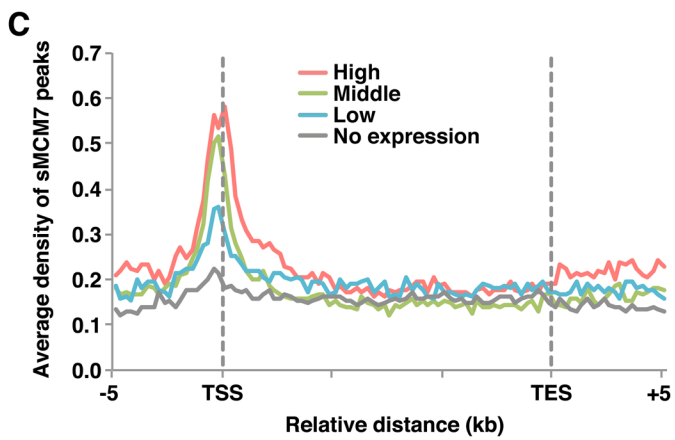

Supplemental Figure S4  
Sugimoto et al.

HeLa

K562

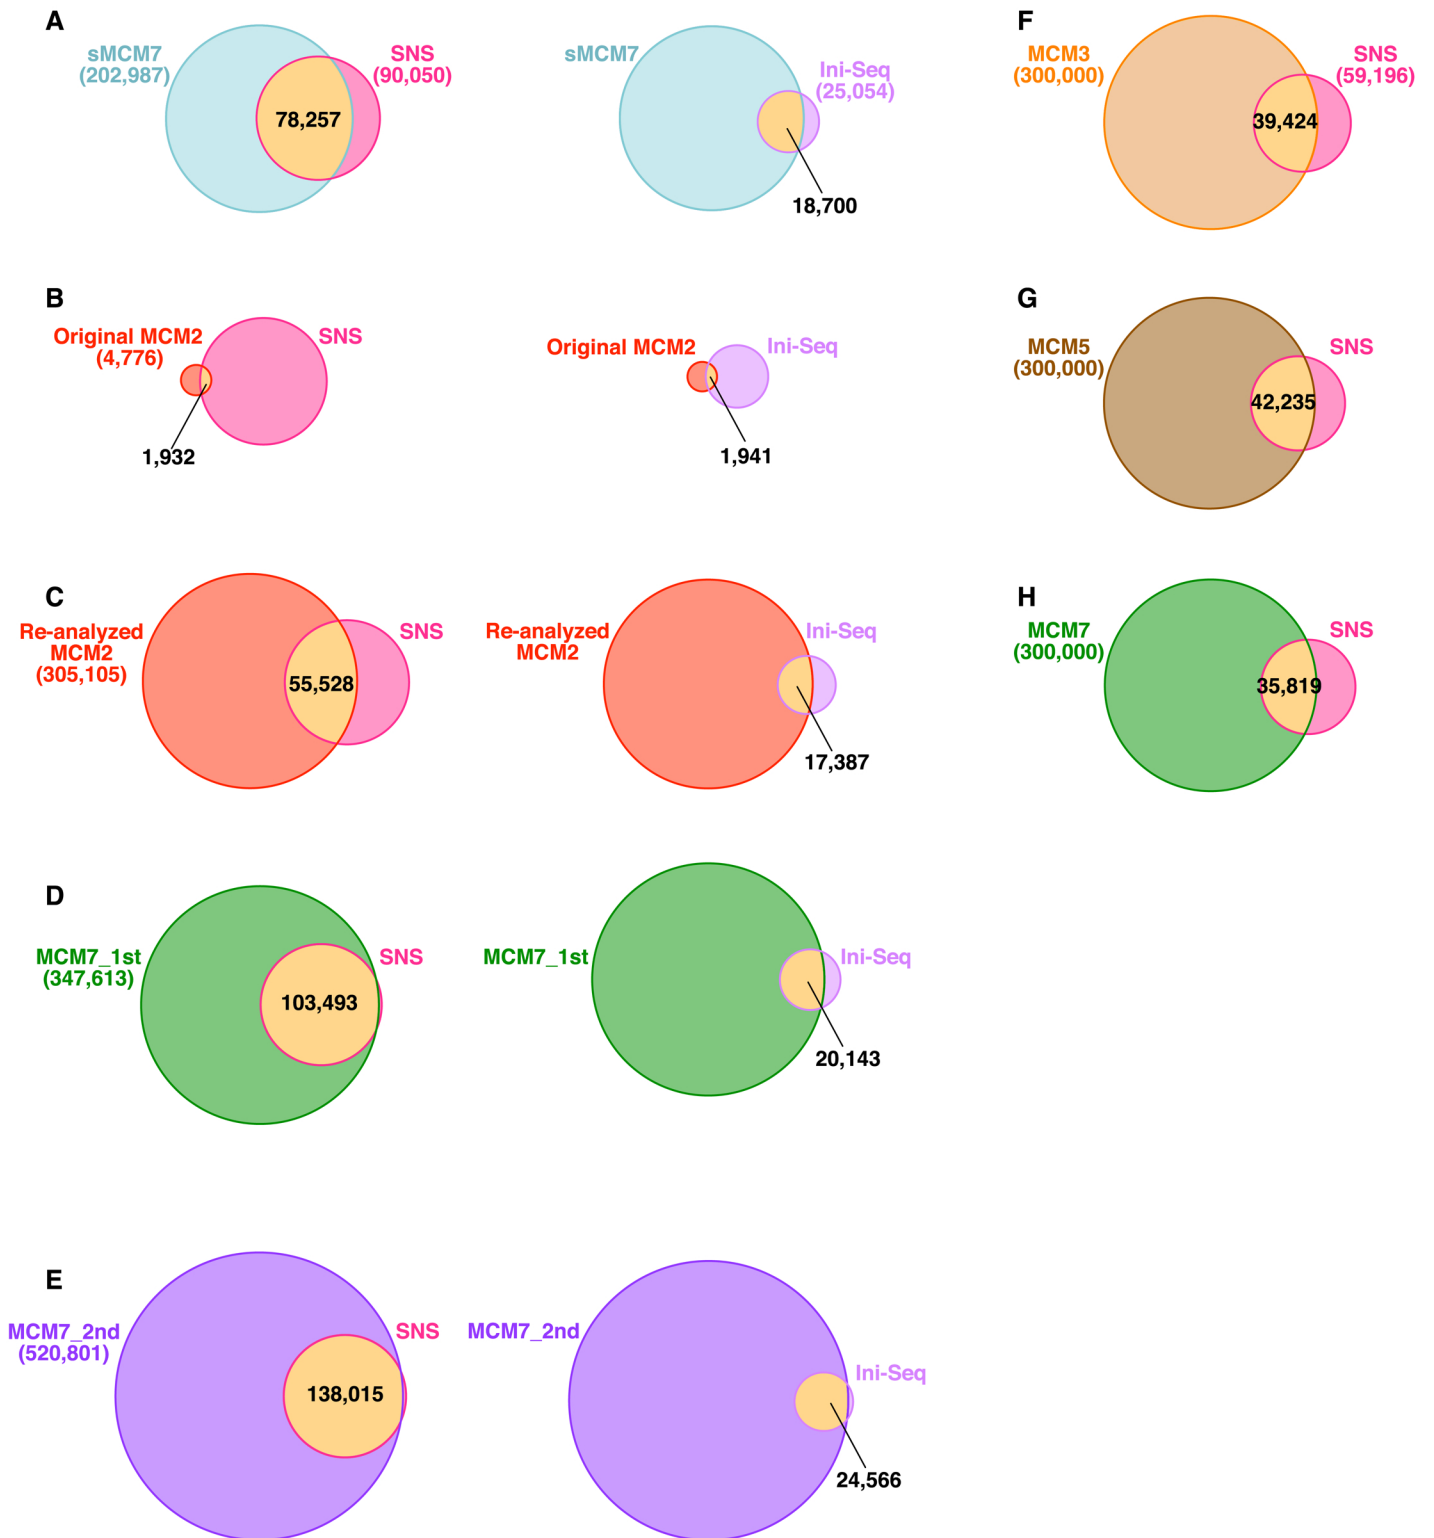

**Supplemental Table S1. Data sources used in this study.**

| Marks/Factors     | GEO accession number or reference of the data | GEO accession number or reference for experimental condition | Note                                                                                          |
|-------------------|-----------------------------------------------|--------------------------------------------------------------|-----------------------------------------------------------------------------------------------|
| MCM7_1st          | (28)                                          | (28)                                                         | Asynchronous HeLa cells                                                                       |
| MCM7_2nd          | This study                                    | This study                                                   | Asynchronous HeLa cells                                                                       |
| SNS-Seq           | (13)                                          | (13)                                                         | Asynchronous HeLa cells                                                                       |
| SNS-Seq (Besnard) | (12)                                          | (12)                                                         | Asynchronous HeLa cells                                                                       |
| Ini-Seq           | (40)                                          | (40)                                                         | Cell-free system (EJ30 cell nuclei)                                                           |
| FAIRE-Seq         | (28)                                          | (28)                                                         | Asynchronous HeLa cells                                                                       |
| DNase-Seq         | GSM816633                                     | GSE32970                                                     | Asynchronous HeLa cells                                                                       |
| Repli-Seq         | GSM923449                                     | GSE34399                                                     | Asynchronous HeLa cells                                                                       |
| H3K9ac            | GSM733756                                     | GSE29611                                                     | Asynchronous HeLa cells                                                                       |
| H3K4me3           | GSM733682                                     | GSE29611                                                     | Asynchronous HeLa cells                                                                       |
| H4K20me1          | GSM733689                                     | GSE29611                                                     | Asynchronous HeLa cells                                                                       |
| H3K27me3          | GSM733696                                     | GSE29611                                                     | Asynchronous HeLa cells                                                                       |
| H3K9me3           | GSM1003480                                    | GSE29611                                                     | Asynchronous HeLa cells                                                                       |
| RNA-Seq           | GSE33480                                      | GSE33480                                                     | Asynchronous HeLa cells                                                                       |
| E2F1              | GSM935484                                     | GSE31477                                                     | Asynchronous HeLa cells                                                                       |
| c-myc             | GSM935320                                     | GSE31477                                                     | Asynchronous HeLa cells                                                                       |
| ELK1              | GSM935326                                     | GSE31477                                                     | Asynchronous HeLa cells                                                                       |
| Nrf1              | GSM935636                                     | GSE31477                                                     | Asynchronous HeLa cells                                                                       |
| Nrf2              | GSM803454                                     | GSE32465                                                     | Asynchronous HeLa cells                                                                       |
| MAZ               | GSM935272                                     | GSE31477                                                     | Asynchronous HeLa cells                                                                       |
| c-Jun             | GSM935341                                     | GSE31477                                                     | Asynchronous HeLa cells                                                                       |
| c-Fos             | GSM935317                                     | GSE31477                                                     | Asynchronous HeLa cells                                                                       |
| STAT3             | GSM935276                                     | GSE31477                                                     | Asynchronous HeLa cells                                                                       |
| TBP               | GSM935606                                     | GSE31477                                                     | Asynchronous HeLa cells                                                                       |
| G4-Seq            | (57)                                          | (57)                                                         | Sequencing DNA from primary B lymphocytes under conditions that promote G4 formation in vitro |
| MCM2              | (38)                                          | (38)                                                         | Asynchronous HeLa cells                                                                       |
| SNS-Seq           | (13)                                          | (13)                                                         | Asynchronous K562 cells                                                                       |
| MCM3              | GSM2424244                                    | GSM2424244                                                   | Asynchronous K562 cells                                                                       |
| MCM5              | GSM2422960                                    | GSM2422960                                                   | Asynchronous K562 cells                                                                       |
| MCM7              | GSM2422918                                    | GSM2422918                                                   | Asynchronous K562 cells                                                                       |

**Supplemental Table S2. Arbitrary classification of gene expression in HeLa cells into four classes based on FPKM values.**

| Class             | FPKM               | Number of genes |
|-------------------|--------------------|-----------------|
| High expression   | 9.66 – 25917.7     | 7,122           |
| Medium expression | 1.48 – 9.66        | 7,122           |
| Low expression    | 9.9138E-236 – 1.48 | 7,122           |
| No expression     | 0                  | 8,162           |

**Supplemental Table S3. Outline of representative functions of transcription factors.**

| Transcription factor | Function                                                                                                                                                                                                                              | Reference |
|----------------------|---------------------------------------------------------------------------------------------------------------------------------------------------------------------------------------------------------------------------------------|-----------|
| E2F1 and c-myc       | Stimulation of the expression of the cell-cycle regulators; Stimulation of ORC recruitment                                                                                                                                            | (89, 90)  |
| ELK1                 | ETS family; Trans-activation of the cell-cycle regulatory gene <i>p21</i>                                                                                                                                                             | (91)      |
| Nrf1                 | Redox-sensitive transcription factor; Binding to promoters of <i>Cdc2</i> , <i>PRC1</i> , <i>PCNA</i> , <i>cyclin B1</i> and <i>CDC25C</i> and controlling their expression                                                           | (92)      |
| Nrf2                 | Pivotal factor for cell protection from oxidative and electrophilic insults; Regulation of the G1 to S phase transition by modulating the expression of <i>p21</i> and the <i>Rb</i>                                                  | (93)      |
| MAZ                  | Zinc finger protein; Promotion of cyclin-dependent kinase inhibitor 1A ( <i>CDKN1A</i> ) expression; Regulation of <i>c-myc</i> transcription                                                                                         | (94, 95)  |
| c-Jun and Fos        | Forming dimer; Promotion of G1 to S phase transition by regulating the expression of the cell-cycle regulators                                                                                                                        | (96, 97)  |
| STAT3                | Latent transcription factors; Primarily mediating signalling from cytokine and growth factor receptors and promoting proliferation by stimulating transcription of <i>cyclin B1</i> , <i>Cdc2</i> , <i>c-myc</i> and <i>cyclin D1</i> | (98)      |

**Supplemental Table S4. List of human genes known as CFSs with gene length and expression level (FPKM).**

| Gene    | CFS    | Gene length (kb) | FPKM   |
|---------|--------|------------------|--------|
| CNTNAP2 | FRA7I  | 2304.6           | 0      |
| DMD     | FRAXC  | 2220.4           | 59.887 |
| DLG2    | FRA11F | 2172.3           | 0.271  |
| CSMD1   | FRA8B  | 2059.5           | 0.002  |
| LRP1B   | FRA2F  | 1900.3           | 0.206  |
| CTNNA3  | FRA10D | 1776.2           | 0.026  |
| NRXN3   | FRA14C | 1697.9           | 0      |
| FHIT    | FRA3B  | 1502.1           | 0.029  |
| MAGI2   | FRA7E  | 1436.5           | 0      |
| PARK2   | FRA6E  | 1380.2           | 0.007  |
| PRKG1   | FRA10C | 1307.2           | 0.008  |
| DAB1    | FRA1B  | 1252.6           | 0.085  |
| CSMD3   | FRA8C  | 1214.1           | 0.207  |
| DCC     | FRA18B | 1195.7           | 0      |
| AUTS2   | FRA7J  | 1194.0           | 0      |
| GPC6    | FRA13D | 1181.2           | 0      |
| CTNNA2  | FRA2E  | 1135.9           | 0.021  |
| OPCML   | FRA11G | 1117.5           | 0      |
| NRXN1   | FRA2D  | 1114.0           | 0      |
| WWOX    | FRA16D | 1113.2           | 4.083  |
| CDH12   | FRA5E  | 1102.8           | 0.022  |
| IMMP2L  | FRA7K  | 899.5            | 11.120 |
| DPYD    | FRA1E  | 843.3            | 9.899  |
| RORA    | FRA15A | 741.0            | 0.347  |
| NBEA    | FRA13A | 730.5            | 0.537  |
| PAPPA   | FRA9E  | 248.5            | 0.908  |
| SMAD5   | FRA5C  | 49.9             | 8.748  |
| TES     | FRA7G  | 48.3             | 19.145 |
| PARP1   | FRA1H  | 47.4             | 33.605 |
| ZNF330  | FRA4C  | 13.8             | 17.847 |
| FZD5    | FRA2I  | 6.8              | 1.359  |

**Supplemental S5. Mean gene length and FPKM values of the 31 genes in the dataset.**

|               | Annotation                                                                     | Mean length (kb) | Mean FPKM   |
|---------------|--------------------------------------------------------------------------------|------------------|-------------|
| CFS           | Supplemental Table S4                                                          | 1129.3 ± 669     | 5.4 ± 12.7  |
| LongGene_RS_1 | Randomly selected 31 genes from long genes that are more than 700 kb in length | 903.9 ± 215      | 0.8 ± 1.3   |
| LongGene_RS_2 | same as above                                                                  | 956.4 ± 212      | 2.2 ± 5.4   |
| LongGene_RS_3 | same as above                                                                  | 1066.0 ± 362     | 1.6 ± 3.4   |
| Gene_RS_1     | Randomly selected 31 genes from all genes                                      | 66.4 ± 116       | 29.2 ± 93.6 |
| Gene_RS_2     | same as above                                                                  | 63.4 ± 90        | 7.1 ± 15.7  |
| Gene_RS_3     | same as above                                                                  | 44.1 ± 77        | 8.9 ± 16.3  |



**Supplemental Table S6. Compliance of qPCR experiments with the MIQE guidelines.**

| ITEM TO CHECK                                                        | IMPORTANCE | CHECKLIST | COMMENTS                                                                                                                                                                                                                                                                                                                                                                                                                                                                                                                                                                                                                                                                                                                                                        |
|----------------------------------------------------------------------|------------|-----------|-----------------------------------------------------------------------------------------------------------------------------------------------------------------------------------------------------------------------------------------------------------------------------------------------------------------------------------------------------------------------------------------------------------------------------------------------------------------------------------------------------------------------------------------------------------------------------------------------------------------------------------------------------------------------------------------------------------------------------------------------------------------|
| Definition of experimental and control groups                        | E          | ✓         | <b>Experimental groups:</b> anti-MCM7 ChIP. <b>Control groups:</b> Rabbit IgG ChIP.                                                                                                                                                                                                                                                                                                                                                                                                                                                                                                                                                                                                                                                                             |
| Number within each group                                             | E          | ✓         | <b>LMNB2 or MCM4:</b> n=8; <b>PAF1 or LRIG2:</b> n = 4                                                                                                                                                                                                                                                                                                                                                                                                                                                                                                                                                                                                                                                                                                          |
| Assay carried out by core lab or investigator's lab?                 | D          | ✓         | Investigator's lab                                                                                                                                                                                                                                                                                                                                                                                                                                                                                                                                                                                                                                                                                                                                              |
| Acknowledgement of authors' contributions                            | D          | ✓         | NS performed qPCR.                                                                                                                                                                                                                                                                                                                                                                                                                                                                                                                                                                                                                                                                                                                                              |
| Description                                                          | E          | ✓         | Tissue culture cells                                                                                                                                                                                                                                                                                                                                                                                                                                                                                                                                                                                                                                                                                                                                            |
| Volume/mass of sample processed                                      | D          | ✓         | 6x10 <sup>6</sup> cells / antibody                                                                                                                                                                                                                                                                                                                                                                                                                                                                                                                                                                                                                                                                                                                              |
| Microdissection or macrodissection                                   | E          | ✓         | Not applicable                                                                                                                                                                                                                                                                                                                                                                                                                                                                                                                                                                                                                                                                                                                                                  |
| Processing procedure                                                 | E          | ✓         | Not applicable                                                                                                                                                                                                                                                                                                                                                                                                                                                                                                                                                                                                                                                                                                                                                  |
| If frozen - how and how quickly?                                     | E          | ✓         | Not applicable                                                                                                                                                                                                                                                                                                                                                                                                                                                                                                                                                                                                                                                                                                                                                  |
| If fixed - with what, how quickly?                                   | E          | ✓         | Not applicable                                                                                                                                                                                                                                                                                                                                                                                                                                                                                                                                                                                                                                                                                                                                                  |
| Sample storage conditions and duration (especially for FFPE samples) | E          | ✓         | Not applicable                                                                                                                                                                                                                                                                                                                                                                                                                                                                                                                                                                                                                                                                                                                                                  |
| Procedure and/or instrumentation                                     | E          | ✓         | After formaldehyde reversal, the samples were serially treated with DNase-free RNase A (final 5 µg, Invitrogen) and Proteinase K (final 50 µg/ml, Roche). The DNA was phenol:chloroform (Nacalai tesque) extracted, ethanol (Nacalai tesque) precipitated in the presence of 1 µl of glycogen (Nacalai tesque), and dissolved in Tris/EDTA buffer.                                                                                                                                                                                                                                                                                                                                                                                                              |
| Name of kit and details of any modifications                         | E          | ✓         | We did not use any kit.                                                                                                                                                                                                                                                                                                                                                                                                                                                                                                                                                                                                                                                                                                                                         |
| Source of additional reagents used                                   | D          | ✓         | Not applicable                                                                                                                                                                                                                                                                                                                                                                                                                                                                                                                                                                                                                                                                                                                                                  |
| Details of DNase or RNase treatment                                  | E          | ✓         | RNase (5 µg, Invitrogen) was added and incubated at 37°C for 30 min.                                                                                                                                                                                                                                                                                                                                                                                                                                                                                                                                                                                                                                                                                            |
| Contamination assessment (DNA or RNA)                                | E          | ✓         | Not performed                                                                                                                                                                                                                                                                                                                                                                                                                                                                                                                                                                                                                                                                                                                                                   |
| Nucleic acid quantification                                          | E          | ✓         | Using the ratio of 260 nm/280 nm                                                                                                                                                                                                                                                                                                                                                                                                                                                                                                                                                                                                                                                                                                                                |
| Instrument and method                                                | E          | ✓         | Nanodrop (Thermo Scientific)                                                                                                                                                                                                                                                                                                                                                                                                                                                                                                                                                                                                                                                                                                                                    |
| Purity (A260/A280)                                                   | D          | ✓         | 1.8 – 1.9                                                                                                                                                                                                                                                                                                                                                                                                                                                                                                                                                                                                                                                                                                                                                       |
| Yield                                                                | D          | ✓         | The mean yield of input DNA was 660 µg/ml, with a minimum value of 532 µg/ml and a maximum value of 877 µg/ml.                                                                                                                                                                                                                                                                                                                                                                                                                                                                                                                                                                                                                                                  |
| RNA integrity method/instrument                                      | E          | ✓         | Not applicable                                                                                                                                                                                                                                                                                                                                                                                                                                                                                                                                                                                                                                                                                                                                                  |
| RIN/RQI or Cq of 3' and 5' transcripts                               | E          | ✓         | Not applicable                                                                                                                                                                                                                                                                                                                                                                                                                                                                                                                                                                                                                                                                                                                                                  |
| Electrophoresis traces                                               | D          | ✓         | Not applicable                                                                                                                                                                                                                                                                                                                                                                                                                                                                                                                                                                                                                                                                                                                                                  |
| Inhibition testing (Cq dilutions, spike or other)                    | E          | ✓         | Not applicable                                                                                                                                                                                                                                                                                                                                                                                                                                                                                                                                                                                                                                                                                                                                                  |
| Complete reaction conditions                                         | E          | ✓         | Not applicable                                                                                                                                                                                                                                                                                                                                                                                                                                                                                                                                                                                                                                                                                                                                                  |
| Amount of RNA and reaction volume                                    | E          | ✓         | Not applicable                                                                                                                                                                                                                                                                                                                                                                                                                                                                                                                                                                                                                                                                                                                                                  |
| Priming oligonucleotide (if using GSP) and concentration             | E          | ✓         | Not applicable                                                                                                                                                                                                                                                                                                                                                                                                                                                                                                                                                                                                                                                                                                                                                  |
| Reverse transcriptase and concentration                              | E          | ✓         | Not applicable                                                                                                                                                                                                                                                                                                                                                                                                                                                                                                                                                                                                                                                                                                                                                  |
| Temperature and time                                                 | E          | ✓         | Not applicable                                                                                                                                                                                                                                                                                                                                                                                                                                                                                                                                                                                                                                                                                                                                                  |
| Manufacturer of reagents and catalogue numbers                       | D          | ✓         | Not applicable                                                                                                                                                                                                                                                                                                                                                                                                                                                                                                                                                                                                                                                                                                                                                  |
| Cqs with and without RT                                              | D          | ✓         | Not applicable                                                                                                                                                                                                                                                                                                                                                                                                                                                                                                                                                                                                                                                                                                                                                  |
| Storage conditions of cDNA                                           | D          | ✓         | Not applicable                                                                                                                                                                                                                                                                                                                                                                                                                                                                                                                                                                                                                                                                                                                                                  |
| If multiplex, efficiency and LOD of each assay.                      | E          | ✓         | Not applicable                                                                                                                                                                                                                                                                                                                                                                                                                                                                                                                                                                                                                                                                                                                                                  |
| Sequence accession number                                            | E          | ✓         | <b>LMNB2:</b> NM_032737.3; <b>MCM4:</b> NG_032967.1; <b>PAF1:</b> AC104106.2; <b>LRIG2:</b> NG_042819.1                                                                                                                                                                                                                                                                                                                                                                                                                                                                                                                                                                                                                                                         |
| Location of amplicon                                                 | D          | ✓         | See Sugimoto et al., Nucleic Acids Research, 43: 5898-5911, 2015. doi: 10.1093/nar/gkv                                                                                                                                                                                                                                                                                                                                                                                                                                                                                                                                                                                                                                                                          |
| Amplicon length                                                      | E          | ✓         | <b>LMNB2 ori:</b> 232 bp; <b>LMNB2 distal:</b> 240 bp; <b>MCM4 ori:</b> 215 bp; <b>MCM4 distal:</b> 209 bp; <b>PAF1 ori:</b> 80 bp; <b>PAF1 distal:</b> 130 bp; <b>LRIG2 ori:</b> 118 bp; <b>LRIG2 distal:</b> 127 bp                                                                                                                                                                                                                                                                                                                                                                                                                                                                                                                                           |
| <i>In silico</i> specificity screen (BLAST, etc)                     | E          | ✓         | We confirmed all primers by BLAST.                                                                                                                                                                                                                                                                                                                                                                                                                                                                                                                                                                                                                                                                                                                              |
| Pseudogenes, retropseudogenes or other homologs?                     | D          | ✓         |                                                                                                                                                                                                                                                                                                                                                                                                                                                                                                                                                                                                                                                                                                                                                                 |
| Sequence alignment                                                   | D          | ✓         |                                                                                                                                                                                                                                                                                                                                                                                                                                                                                                                                                                                                                                                                                                                                                                 |
| Secondary structure analysis of amplicon                             | D          | ✓         |                                                                                                                                                                                                                                                                                                                                                                                                                                                                                                                                                                                                                                                                                                                                                                 |
| Location of each primer by exon or intron (if applicable)            | E          | ✓         | Not applicable                                                                                                                                                                                                                                                                                                                                                                                                                                                                                                                                                                                                                                                                                                                                                  |
| What splice variants are targeted?                                   | E          | ✓         | Not applicable                                                                                                                                                                                                                                                                                                                                                                                                                                                                                                                                                                                                                                                                                                                                                  |
| Primer sequences                                                     | E          | ✓         | <b>LMNB2 ori Forward:</b> ggctggcattgacattcctcag, <b>Reverse:</b> gggaggatcttttagacatc;<br><b>LMNB2 distal Forward:</b> gttacacagtcagcgcattggcc, <b>Reverse:</b> ccatcagggtcaccctctggtcc;<br><b>MCM4 ori Forward:</b> ggacattacagatgatttctc, <b>Reverse:</b> aagagttccaattgttctctc;<br><b>MCM4 distal Forward:</b> tacctgtggtaagagatgagttg, <b>Reverse:</b> ctctatacatgcaacgacttggg;<br><b>PAF1 ori Forward:</b> tcggaaccacacagcattg, <b>Reverse:</b> ctctccaccaatcacagaagca;<br><b>PAF1 distal Forward:</b> agtgtctgagtagctggttc, <b>Reverse:</b> attgctcggagtagacaactgg;<br><b>LRIG2 ori Forward:</b> actgcagtcgaggaaattg, <b>Reverse:</b> ctccccctcttttggtcac;<br><b>LRIG2 distal Forward:</b> tggacatcagcttggatcac, <b>Reverse:</b> gcatctctggattaacatcccac |
| RTPrimerDB Identification Number                                     | D          | ✓         | Not applicable                                                                                                                                                                                                                                                                                                                                                                                                                                                                                                                                                                                                                                                                                                                                                  |
| Probe sequences                                                      | D          | ✓         | Not applicable                                                                                                                                                                                                                                                                                                                                                                                                                                                                                                                                                                                                                                                                                                                                                  |
| Location and identity of any modifications                           | E          | ✓         | Not modified                                                                                                                                                                                                                                                                                                                                                                                                                                                                                                                                                                                                                                                                                                                                                    |
| Manufacturer of oligonucleotides                                     | D          | ✓         | <b>LMNB2 and MCM4:</b> FASMAG; <b>PAF1 and LRIG2:</b> SIGMA                                                                                                                                                                                                                                                                                                                                                                                                                                                                                                                                                                                                                                                                                                     |
| Purification method                                                  | D          | ✓         | <b>LMNB2 and MCM4:</b> Reversed-phase chromatography; <b>PAF1 and LRIG2:</b> OPC purification                                                                                                                                                                                                                                                                                                                                                                                                                                                                                                                                                                                                                                                                   |
| Complete reaction conditions                                         | E          | ✓         | PCR reactions were performed in a CFX96 Real-Time PCR Detection system (Bio-Rad) using SYBR Premix EX Taq II (Takara) in final volume of 25 µl. Reaction mix consisted of sterile H <sub>2</sub> O MilliQ, 12.5 µl 2x SYBR Premix ExTaq II, 1µl 5µM each forward and reverse primers and 1 µl ChIPed-DNA.                                                                                                                                                                                                                                                                                                                                                                                                                                                       |
| Reaction volume and amount of cDNA/DNA                               | E          | ✓         | Reaction volume: 25 µl; amount of ChIPed DNA: 1 µl                                                                                                                                                                                                                                                                                                                                                                                                                                                                                                                                                                                                                                                                                                              |
| Primer, (probe), Mg++ and dNTP concentrations                        | E          | ✓         | 200 nM primers                                                                                                                                                                                                                                                                                                                                                                                                                                                                                                                                                                                                                                                                                                                                                  |
| Polymerase identity and concentration                                | E          | ✓         | Manufactures proprietary                                                                                                                                                                                                                                                                                                                                                                                                                                                                                                                                                                                                                                                                                                                                        |
| Buffer/kit identity and manufacturer                                 | E          | ✓         | SYBR Premix EX Taq II (Takara)                                                                                                                                                                                                                                                                                                                                                                                                                                                                                                                                                                                                                                                                                                                                  |
| Exact chemical constitution of the buffer                            | D          | ✓         | Manufactures proprietary                                                                                                                                                                                                                                                                                                                                                                                                                                                                                                                                                                                                                                                                                                                                        |
| Additives (SYBR Green I, DMSO, etc.)                                 | E          | ✓         | No additives                                                                                                                                                                                                                                                                                                                                                                                                                                                                                                                                                                                                                                                                                                                                                    |
| Manufacturer of plates/tubes and catalog number                      | D          | ✓         | 96-well plates (SKPCR96C) and PCR Strip Caps (SKPCR8FC), both provided by SEIKO Co. LTD (Japan).                                                                                                                                                                                                                                                                                                                                                                                                                                                                                                                                                                                                                                                                |
| Complete thermocycling parameters                                    | E          | ✓         | <b>LMNB2 and MCM4:</b> 1 min at 95°C; five cycles at 95°C for 30 sec, annealing temperature plus 4°C for 30 sec, and 72°C for 30 sec, five cycles at 95°C for 30 sec, annealing temperature plus 2°C for 30 sec, and 72°C for 30 sec; and 50 cycles at 95°C for 30 sec, annealing temperature for 30 sec, and 72°C for 30 sec.<br><b>PAF1 and LRIG2:</b> 1 min at 95°C; and 50 cycles at 95°C for 30 sec, annealing temperature for 30 sec, and 72°C for 30 sec.<br>The annealing temperatures were set as follows:<br><b>LMNB2 ori:</b> 62.9°C; <b>LMNB2 distal:</b> 67.1°C; <b>MCM4 ori:</b> 55.1°C; <b>MCM4 distal:</b> 65.5°C; <b>PAF1 ori and PAF1 distal:</b> 60.2°C; <b>LRIG2 ori and LRIG2 distal:</b> 59.8°C                                           |
| Reaction setup (manual/robotic)                                      | D          | ✓         | Manual setup                                                                                                                                                                                                                                                                                                                                                                                                                                                                                                                                                                                                                                                                                                                                                    |
| Manufacturer of qPCR instrument                                      | E          | ✓         | CFX96 Real-Time PCR Detection system (Bio-Rad)                                                                                                                                                                                                                                                                                                                                                                                                                                                                                                                                                                                                                                                                                                                  |

|                                                          |   |   |                                                                                                                                                                                                                                                                                                                                                                                                 |
|----------------------------------------------------------|---|---|-------------------------------------------------------------------------------------------------------------------------------------------------------------------------------------------------------------------------------------------------------------------------------------------------------------------------------------------------------------------------------------------------|
| Evidence of optimisation (from gradients)                | D | ✓ | None                                                                                                                                                                                                                                                                                                                                                                                            |
| Specificity (gel, sequence, melt, or digest)             | E | ✓ | Melting curve analysis, ramping from 72°C to 95°C in steps of 0.5°C, where fluorescence data are measured continuously. Gene-specific amplification was confirmed by a single band in 3% agarose gel electrophoresis stained with ethidium bromide. No template controls (no cDNA in PCR) were run for each gene to detect unspecific amplification and primer dimerization.                    |
| For SYBR Green I, Cq of the NTC                          | E | ✓ | > 40 or no amplification                                                                                                                                                                                                                                                                                                                                                                        |
| Standard curves with slope and y-intercept               | E | ✓ | Representative values are shown.<br><b>LMNB2 ori:</b> $y = -3.162x + 26.675$ ; <b>LMNB2 distal:</b> $y = -3.239x + 26.882$ ; <b>MCM4 ori:</b> $y = -3.366x + 28.005$ ; <b>MCM4 distal:</b> $y = -3.212x + 29.118$ ; <b>PAF1 ori:</b> $y = -3.555x + 41.135$ ; <b>PAF1 distal:</b> $y = -3.253x + 40.52$ ; <b>LRIG2 ori:</b> $y = -3.35x + 40.243$ ; <b>LRIG2 distal:</b> $y = -3.256x + 40.106$ |
| PCR efficiency calculated from slope                     | E | ✓ | <b>LMNB2 ori:</b> 82.688 – 127.65%; <b>LMNB2 distal:</b> 82.86 – 121.53%; <b>MCM4 ori:</b> 80.75 – 117.52%; <b>MCM4 distal:</b> 78.52 – 109.72%; <b>PAF1 ori:</b> 89.57 – 115.38%; <b>PAF1 distal:</b> 84.18 – 109.28%; <b>LRIG2 ori:</b> 91.46 – 128.26%; <b>LRIG2 distal:</b> 95.11 – 110.99%                                                                                                 |
| Confidence interval for PCR efficiency or standard error | D |   |                                                                                                                                                                                                                                                                                                                                                                                                 |
| r <sup>2</sup> of standard curve                         | E | ✓ | <b>LMNB2 ori:</b> 0.98 – 1.0; <b>LMNB2 distal:</b> 0.993 – 1.0; <b>MCM4 ori:</b> 0.982 – 1.0; <b>MCM4 distal:</b> 0.988 – 1.0; <b>PAF1 ori:</b> 0.986 – 0.999; <b>PAF1 distal:</b> 0.982 – 0.998; <b>LRIG2 ori:</b> 0.981 – 0.999; <b>LRIG2 distal:</b> 0.990 – 0.998                                                                                                                           |
| Linear dynamic range                                     | E | ✓ | The Cq values of unknown samples fell within the linear range.                                                                                                                                                                                                                                                                                                                                  |
| Cq variation at lower limit                              | E | ✓ | Not performed                                                                                                                                                                                                                                                                                                                                                                                   |
| Confidence intervals throughout range                    | D | ✓ | Not performed                                                                                                                                                                                                                                                                                                                                                                                   |
| Evidence for limit of detection                          | E | ✓ | Not performed                                                                                                                                                                                                                                                                                                                                                                                   |
| If multiplex, efficiency and LOD of each assay.          | E | ✓ | Not applicable                                                                                                                                                                                                                                                                                                                                                                                  |
| qPCR analysis program (source, version)                  | E | ✓ | CFX Manager Software (Bio-Rad), version 3.1                                                                                                                                                                                                                                                                                                                                                     |
| Cq method determination                                  | E | ✓ | The CFX software Single Threshold mode was used to determine Cq for each gene                                                                                                                                                                                                                                                                                                                   |
| Outlier identification and disposition                   | E | ✓ | None of the Cq values was discarded                                                                                                                                                                                                                                                                                                                                                             |
| Results of NTCs                                          | E | ✓ | > 40 or no amplification                                                                                                                                                                                                                                                                                                                                                                        |
| Justification of number and choice of reference genes    | E | ✓ | Not applicable                                                                                                                                                                                                                                                                                                                                                                                  |
| Description of normalisation method                      | E | ✓ | Standard curve quantification                                                                                                                                                                                                                                                                                                                                                                   |
| Number and concordance of biological replicates          | D | ✓ | <b>LMNB2 or MCM4:</b> n=4; <b>PAF1 or LRIG2:</b> n = 2                                                                                                                                                                                                                                                                                                                                          |
| Number and stage (RT or qPCR) of technical replicates    | E | ✓ | qPCR reactions were performed in duplicate                                                                                                                                                                                                                                                                                                                                                      |
| Repeatability (intra-assay variation)                    | E | ✓ | Standard deviation of duplicates: 0.002 – 0.04                                                                                                                                                                                                                                                                                                                                                  |
| Reproducibility (inter-assay variation, %CV)             | D |   |                                                                                                                                                                                                                                                                                                                                                                                                 |
| Power analysis                                           | D |   |                                                                                                                                                                                                                                                                                                                                                                                                 |
| Statistical methods for result significance              | E | ✓ | Student's t-test                                                                                                                                                                                                                                                                                                                                                                                |
| Software (source, version)                               | E | ✓ | Microsoft Excel version 14.7.3                                                                                                                                                                                                                                                                                                                                                                  |
| Cq or raw data submission using RDML                     | D |   |                                                                                                                                                                                                                                                                                                                                                                                                 |

## SUPPLEMENTAL REFERENCES

89. Bosco,G., Du,W. and Orr-Weaver,T.L. (2001) DNA replication control through interaction of E2F-RB and the origin recognition complex. *Nat. Cell Biol.*, **3**, 289–295.
90. Dominguez-Sola,D., Ying,C.Y., Grandori,C., Ruggiero,L., Chen,B., Li,M., Galloway,D.A., Gu,W., Gautier,J. and Dalla-Favera,R. (2007) Non-transcriptional control of DNA replication by c-Myc. *Nature*, **448**, 445–451.
91. Shin,S.Y., Kim,C.G., Lim,Y. and Lee,Y.H. (2011) The ETS family transcription factor ELK-1 regulates induction of the cell cycle-regulatory gene p21(Waf1/Cip1) and the BAX gene in sodium arsenite-exposed human keratinocyte HaCaT cells. *J. Biol. Chem.*, **286**, 26860–26872.
92. Okoh,V.O., Garba,N.A., Penney,R.B., Das,J., Deoraj,A., Singh,K.P., Sarkar,S., Felty,Q., Yoo,C., Jackson,R.M., et al. (2015) Redox signalling to nuclear regulatory proteins by reactive oxygen species contributes to oestrogen-induced growth of breast cancer cells. *Br. J. Cancer*, **112**, 1687–1702.
93. Homma,S., Ishii,Y., Morishima,Y., Yamadori,T., Matsuno,Y., Haraguchi,N., Kikuchi,N., Satoh,H., Sakamoto,T., Hizawa,N., et al. (2009) Nrf2 enhances cell proliferation and resistance to anticancer drugs in human lung cancer. *Clin. Cancer Res.*, **15**, 3423–3432.
94. Ugai,H., Li,H.O., Komatsu,M., Tsutsui,H., Song,J., Shiga,T., Fearon,E., Murata,T. and Yokoyama,K.K. (2001) Interaction of Myc-associated zinc finger protein with DCC, the product of a tumor-suppressor gene, during the neural differentiation of P19 EC cells. *Biochem. Biophys. Res. Commun.*, **286**, 1087–1097.
95. Ray,A., Shakya,A., Kumar,D. and Ray,B.K. (2004) Overexpression of serum amyloid A-activating factor 1 inhibits cell proliferation by the induction of cyclin-dependent protein kinase inhibitor p21WAF-1/Cip-1/Sdi-1 expression. *J. Immunol.* (Baltimore, Md. 1950), **172**, 5006–5015.
96. Ryseck,R.P., Hirai,S.I., Yaniv,M. and Bravo,R. (1988) Transcriptional activation of c-jun during the G0/G1 transition in mouse fibroblasts. *Nature*, **334**, 535–537.
97. Kovary,K. and Bravo,R. (1991) The jun and fos protein families are both required for cell cycle progression in fibroblasts. *Mol. Cell. Biol.*, **11**, 4466–4472.
98. Jarnicki,A., Putoczki,T. and Ernst,M. (2010) Stat3: linking inflammation to epithelial cancer - more than a 'gut' feeling? *Cell Div.*, **5**, 14.
